# Supplementary material
Source: HighWire-hosted journal article supplement (http://www.cmaj.ca/highwire/filestream/69679/field_highwire_adjunct_files/0/170289-res-visual-abstract.pdf)
Supplement: 170289-res-visual-abstract.pdf [file 170289-res-visual-abstract.pdf]

# PATIENT-REPORTED OUTCOMES AFTER CLEFT LIP AND/OR PALATE TREATMENT

## A VISUAL RESEARCH ABSTRACT

### Survey study

**2434** children and young adults

**12** countries

CLEFT-Q scale measured how patients felt about:

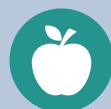

Eating, drinking

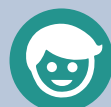

Appearance of the face, nostrils, nose, teeth, lips, jaws, cleft lip scar

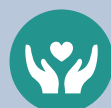

Health-related quality of life (social, psychological, school, speech distress)

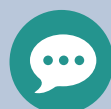

Speech function

Lower scores on CLEFT-Q scales were reported by patients:

- ▶ With a speech problem
- ▶ Unhappy with facial appearance
- ▶ Needing future cleft-related treatments

**Compared with the norms for age, sex and cleft type, poorer outcomes were associated with:**

Older age | Female sex | Visible cleft

The CLEFT-Q provides clinicians with a cross-cultural instrument used to evaluate and compare patient-reported outcomes of cleft lip and/or palate treatment.
